# Supplementary material
Source: PubMed Central journal article supplement (PMC4134105)

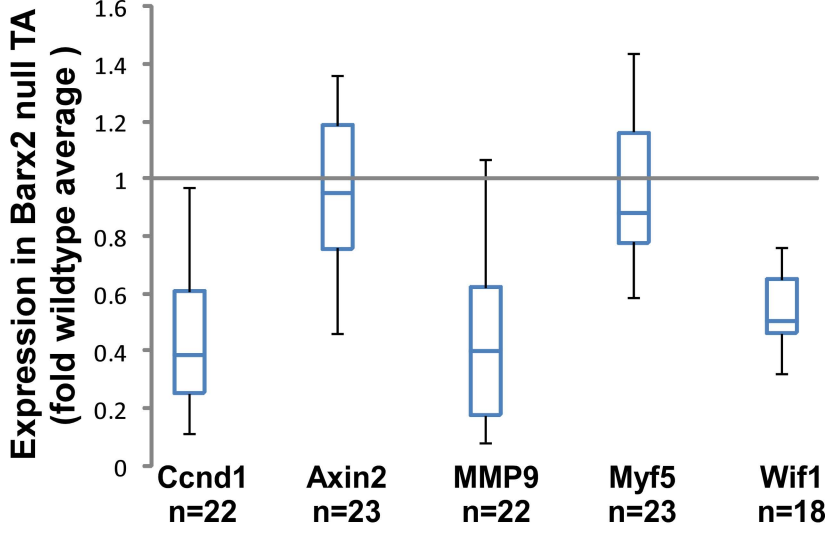

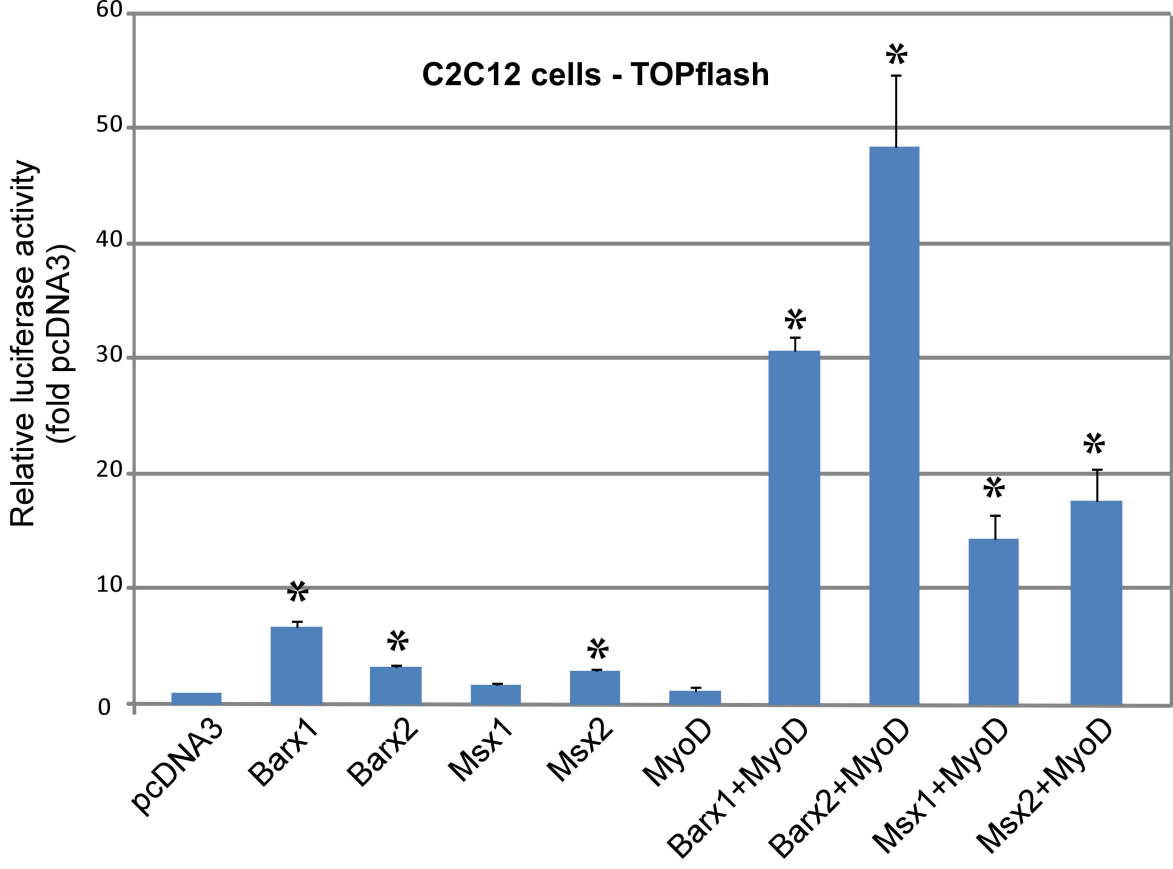

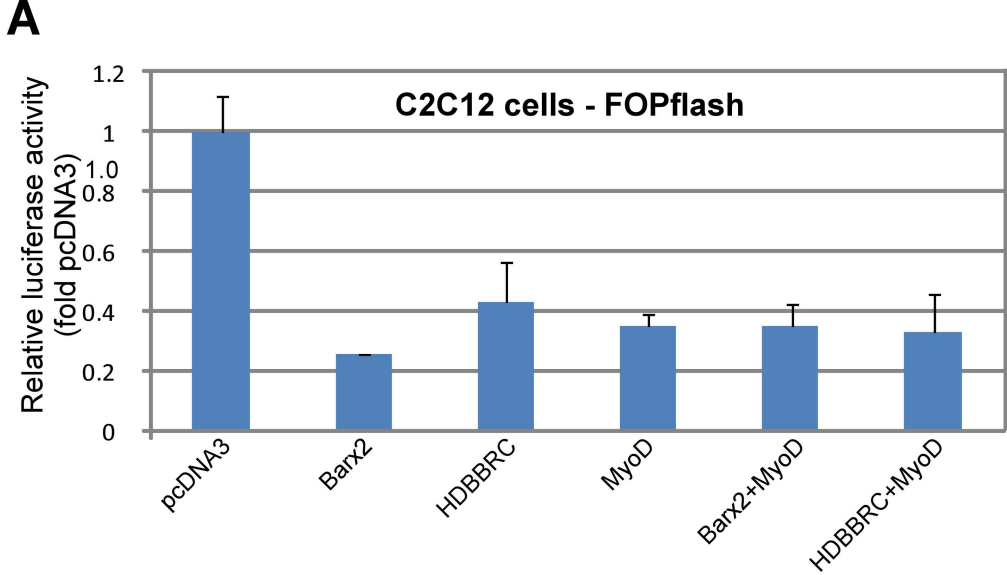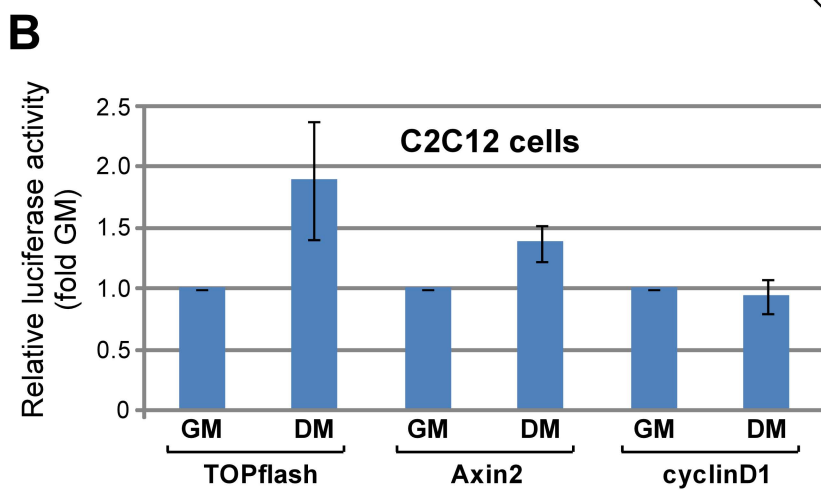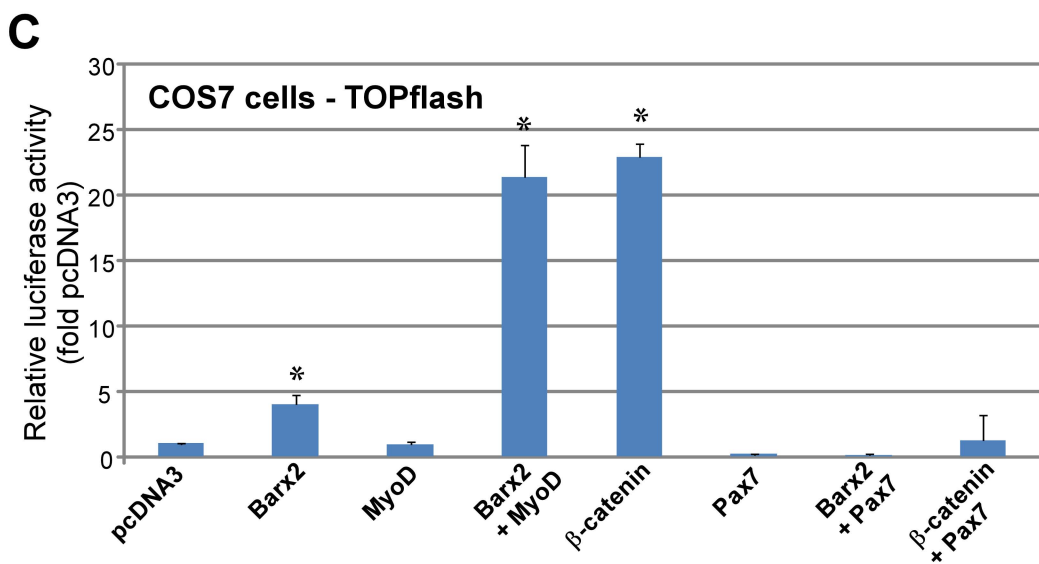

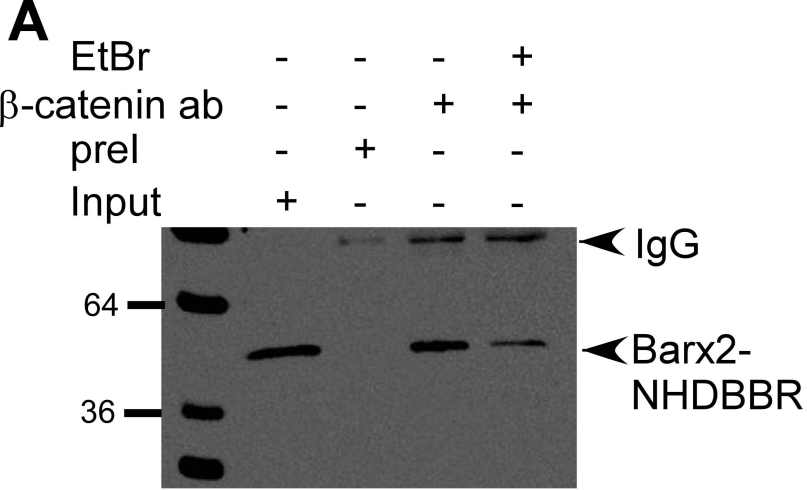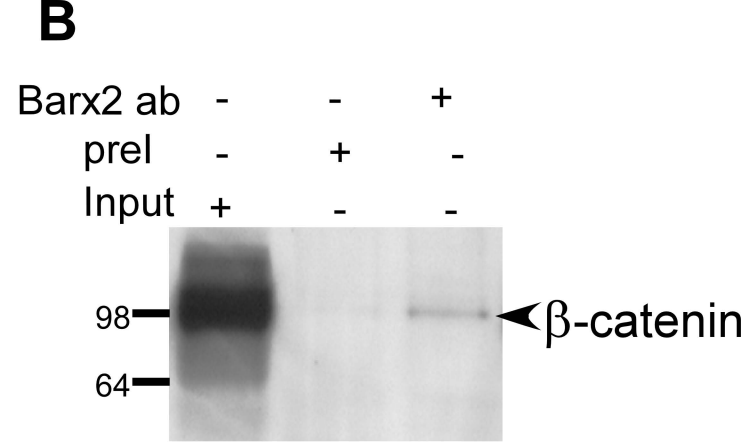

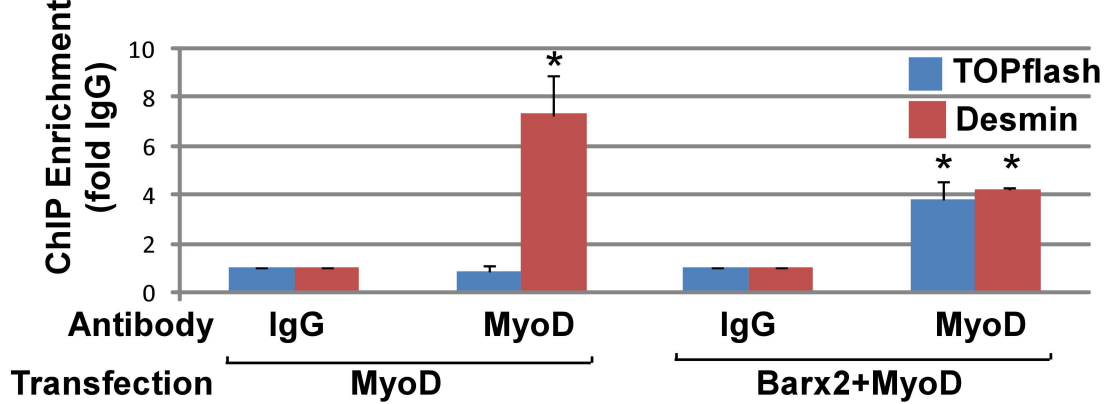

Supplement: NIHMS596823-supplement-Supp_Fig_S2-S6.pdf [file NIHMS596823-supplement-Supp_Fig_S2-S6.pdf]
